# Supplementary material
Source: Springer Nature journal article supplement (https://www.springermedizin.de/resource/supplementary/13045_2010_140_MOESM11_ESM.pdf/9660844)

# SUP-B15 (resistant)

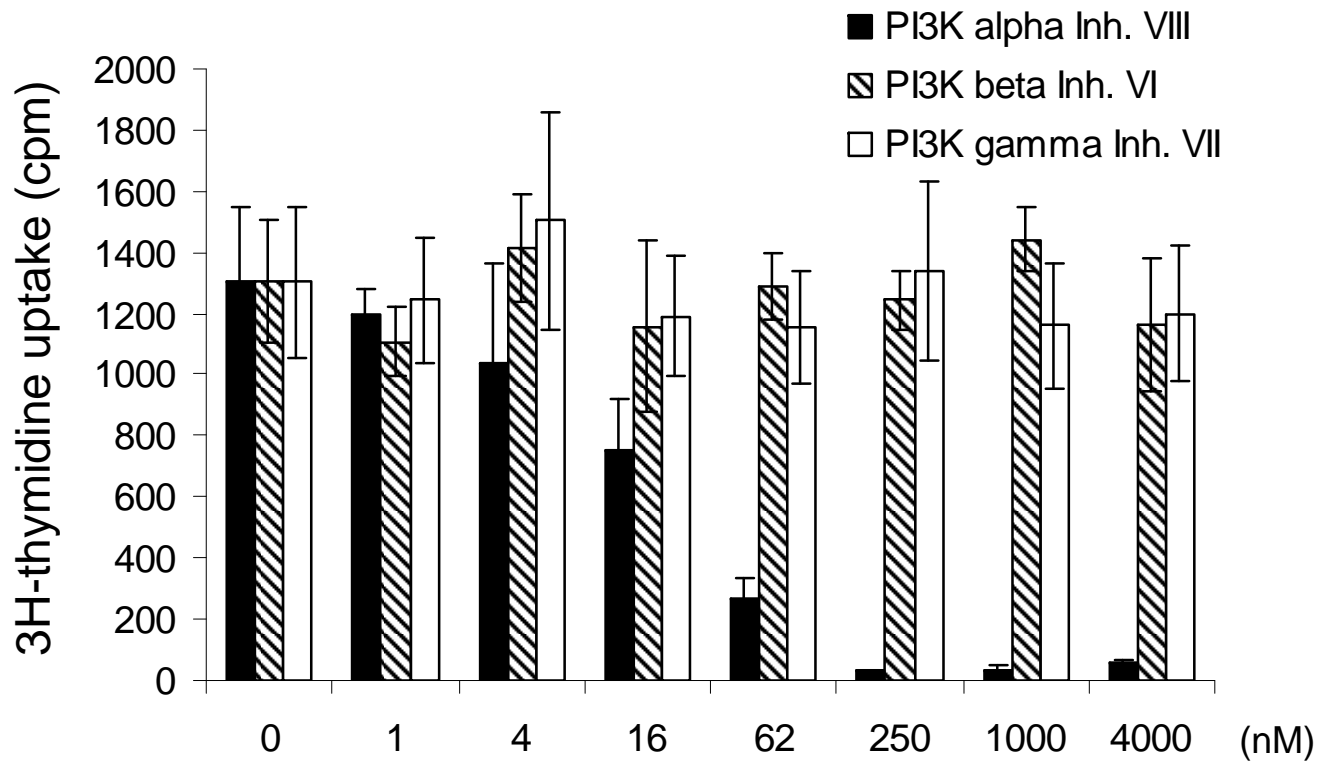

Supplement: MOESM11 [file 9660844]
